# Supplementary material for: Industrially weavable metal/cotton yarn air electrodes for highly flexible and stable wire-shaped Li–O2 batteries
Source: Royal Society of Chemistry journal article supplement (doi:10.1039/c6ta09806a), 2017-01-01
Supplement: c6ta09806a1.pdf [file c6ta09806a1.pdf]

## Support Information

### **Industrially weavable metal/cotton yarn air electrodes for highly flexible and stable wire-shaped Li-O<sub>2</sub> batteries**

Xiujing Lin,<sup>a</sup> Qi Kang,<sup>a</sup> Ziqiang Zhang,<sup>a</sup> Ruiqing Liu,<sup>a</sup> Yi Li,<sup>a</sup> Zhengdong Huang,<sup>a</sup> Xiaomiao Feng,<sup>a</sup>

Yanwen Ma<sup>\*a</sup> and Wei Huang<sup>\*ab</sup>

<sup>a</sup>Key Laboratory for Organic Electronics & Information Displays & Institute of Advanced Materials (IAM), Jiangsu National Synergetic Innovation Center for Advanced Materials (SICAM), Nanjing University of Posts & Telecommunications, 9 Wenyuan Road, Nanjing 210023, China.

<sup>b</sup>Key Laboratory of Flexible Electronics (KLOFE) & Institute of Advanced Materials (IAM), Jiangsu National Synergetic Innovation Center for Advanced Materials (SICAM), Nanjing Tech University (NanjingTech), 30 South Puzhu Road, Nanjing 211816, China.

---

\* Corresponding author. Tel.: +86 25 8586 6533; Tel: +86 25 8586 6396  
E-mail address: iamywma@njupt.edu.cn, wei-huang@njtech.edu.cn, iamwhuang@njupt.edu.cn

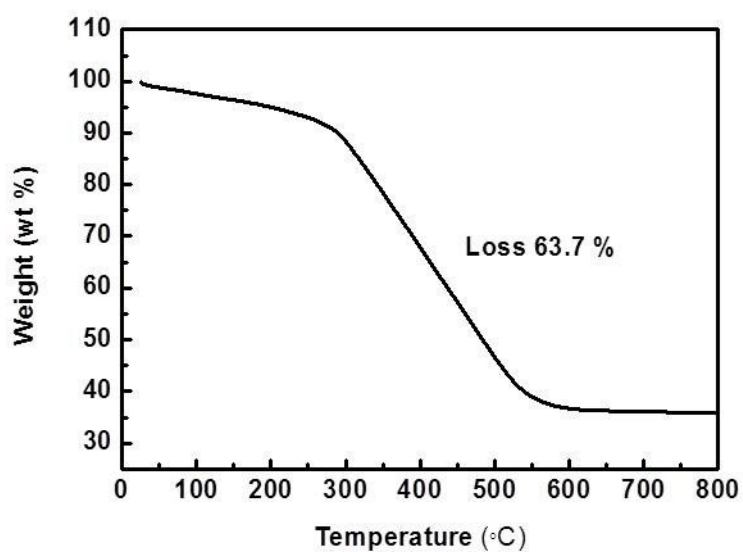

**Fig. S1** Thermal gravimetric analysis (TGA) curve for RuO<sub>2</sub>/N-CNTs sample.

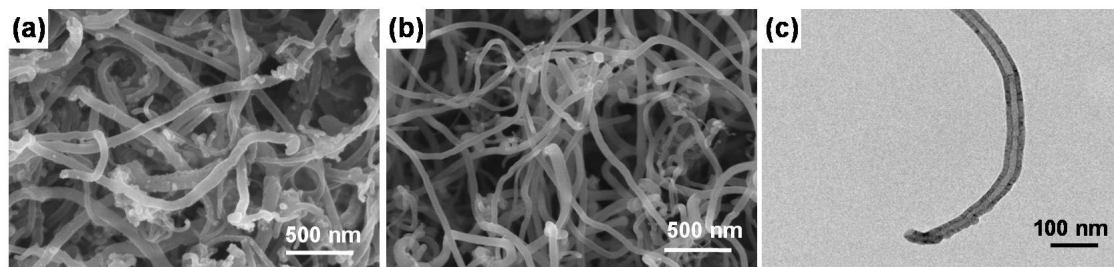

**Fig. S2** (a) SEM image of the RuO<sub>2</sub>/N-CNTs sample; (b) SEM image and (c) TEM image of the pristine N-CNTs sample.

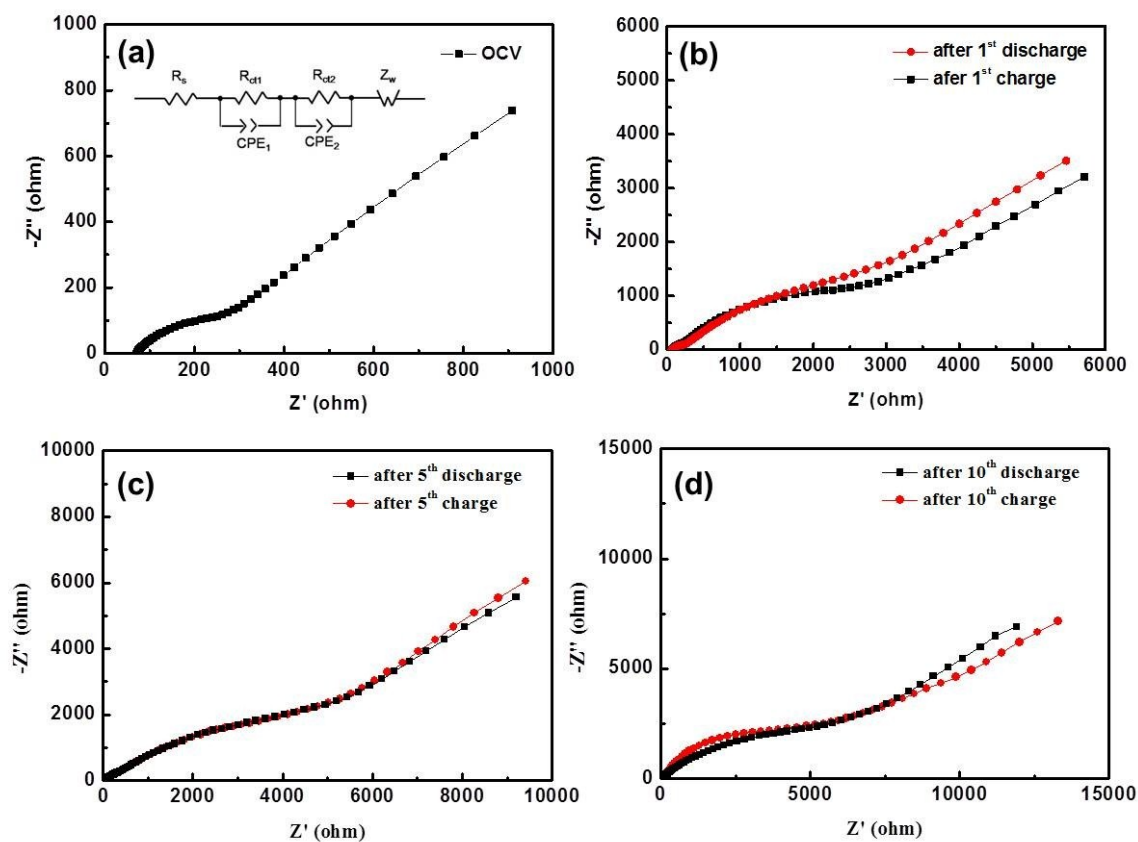

**Fig. S3** Electrochemical impedance spectra of the RuO<sub>2</sub>/N-CNTs electrode.

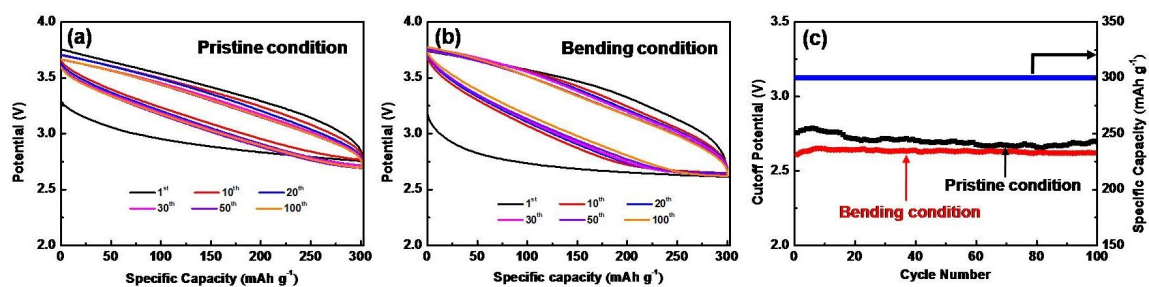

**Fig. S4** Charge and discharge curves and the corresponding cycling performance of the fabricated wire-shaped Li-O<sub>2</sub> batteries with pristine and bending condition at a current density of 200 mA g<sub>total</sub><sup>-1</sup>, with a limit capacity of 300 mAh g<sub>total</sub><sup>-1</sup>

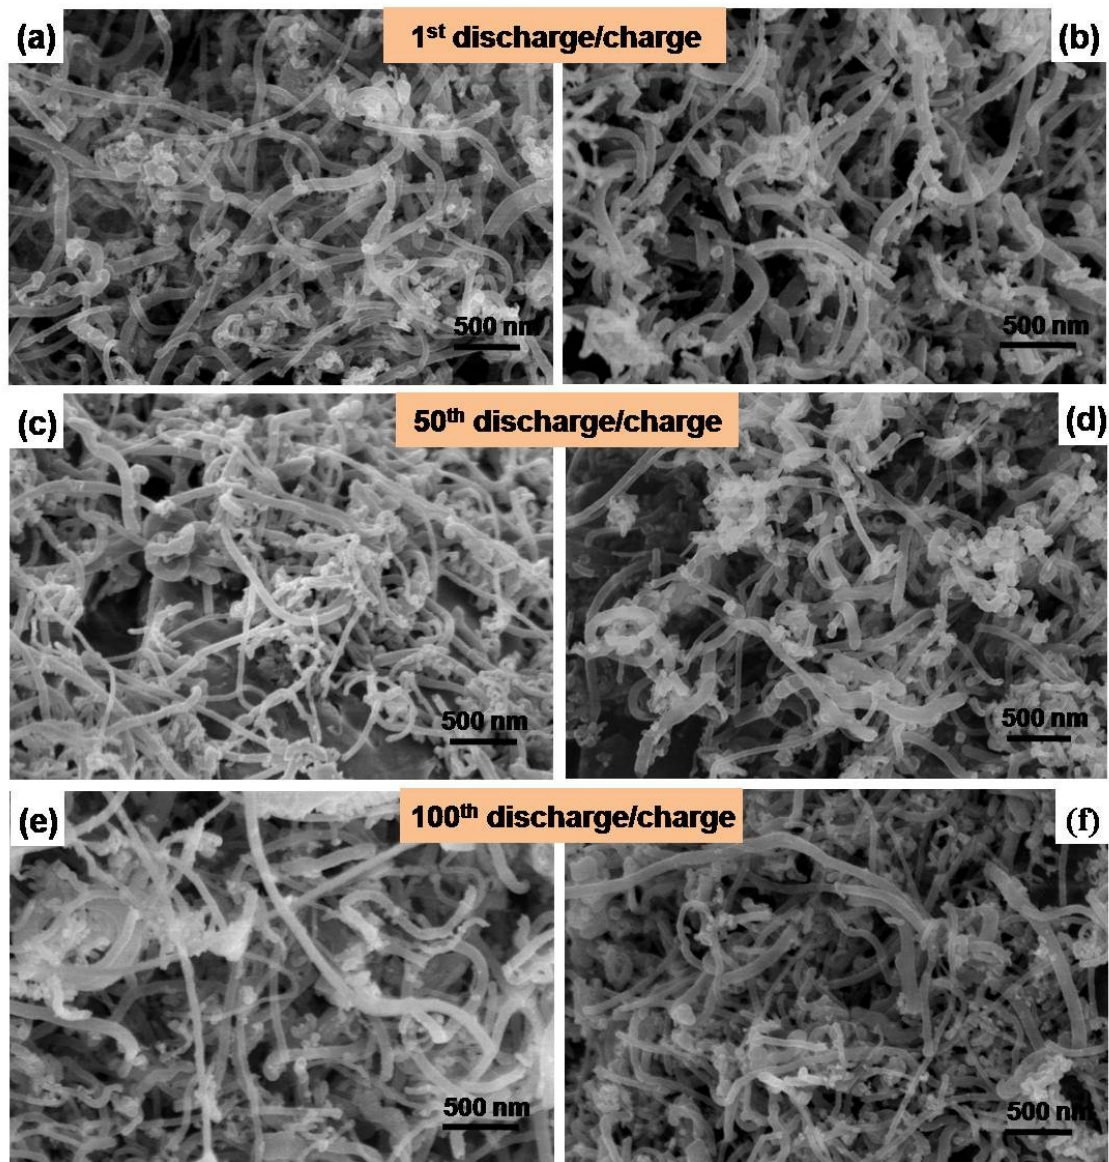

**Fig. S5** The SEM images of the RuO<sub>2</sub>/N-CNTs electrode after (a) 1<sup>st</sup> discharge, (b) 1<sup>st</sup> charge, (c) 50<sup>th</sup> discharge, (d) 50<sup>th</sup> charge, (e) 100<sup>th</sup> discharge and (f) 100<sup>th</sup> charge at current density of 200 mA g<sub>total</sub><sup>-1</sup>, with a limit capacity of 600 mAh g<sub>total</sub><sup>-1</sup>.
